# Supplementary material for: Synthesis and Microwave Absorption Properties of Sulfur-Free Expanded Graphite/Fe3O4 Composites
Source: MDPI journal article supplement (doi:10.3390/molecules25133044), 2020-07-03
Supplement: s1 [file s1]

Supplementary Material

# Synthesis and Microwave Absorption Properties of Sulfur-Free Expanded Graphite/ $\text{Fe}_3\text{O}_4$ Composites

Jian Sun, Lijie Li, Rui Yu, Xianlong Ma, Shaohua Jin, Kun Chen, Shusen Chen, Xijuan Lv\* and Qinghai Shu\*

School of Materials Science and Engineering, Beijing Institute of Technology, Beijing 100081

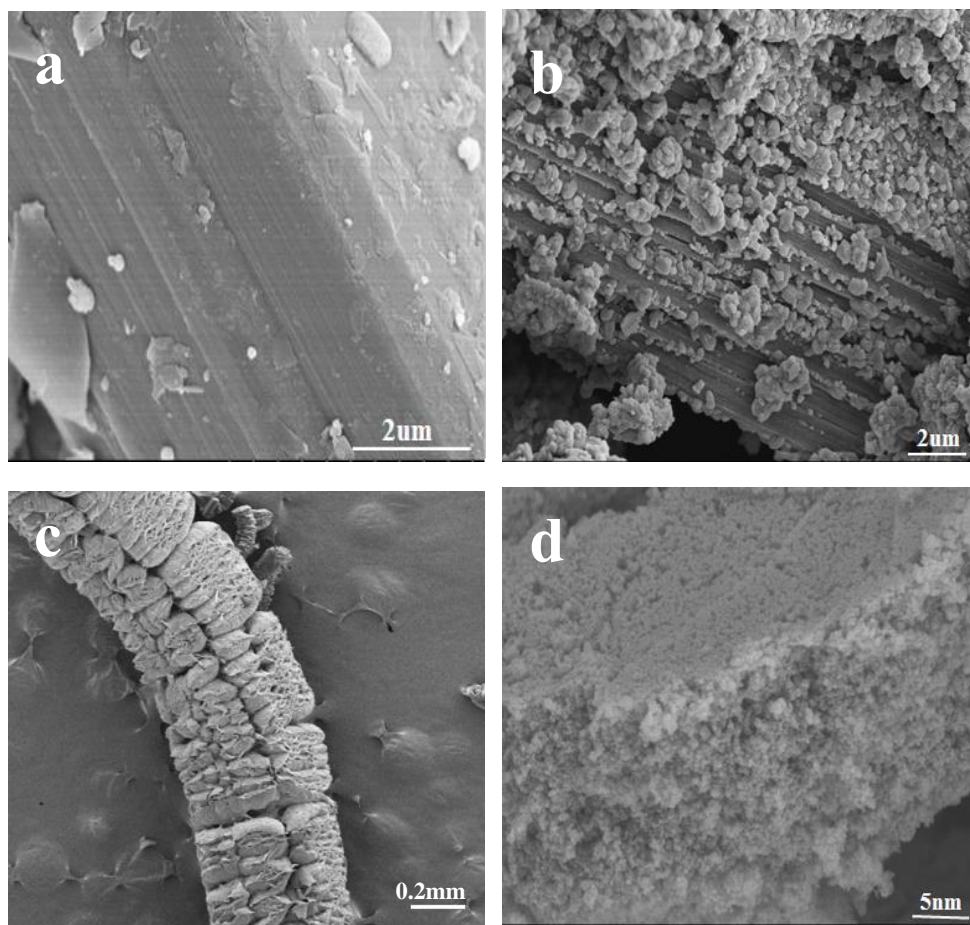

**Figure 1.** SEM images of NG (a), GIC (b), EG (c) and  $\text{Fe}_3\text{O}_4$  (d).

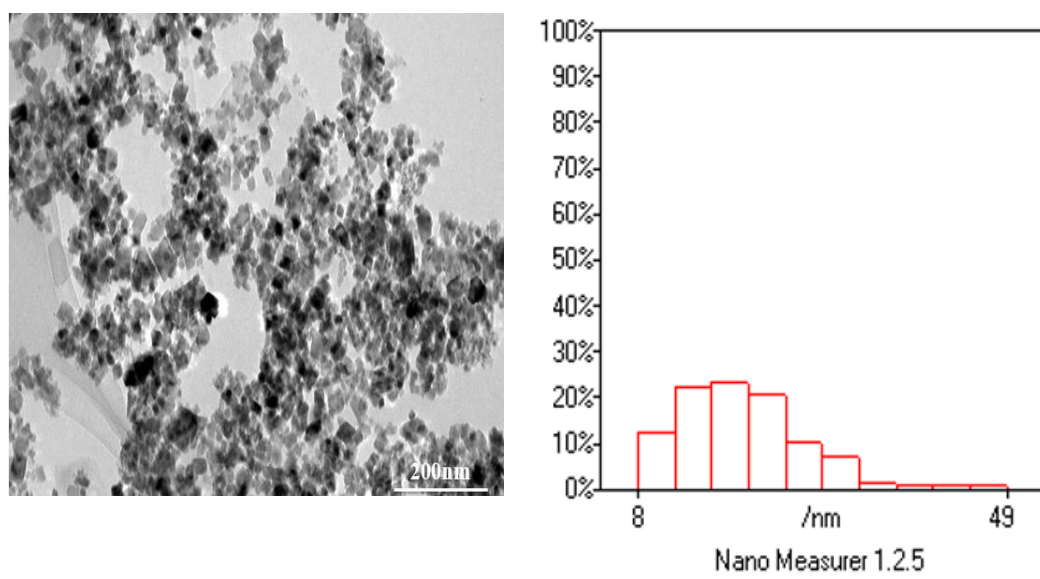

**Figure 2.** The particle size distribution of the  $\text{Fe}_3\text{O}_4$

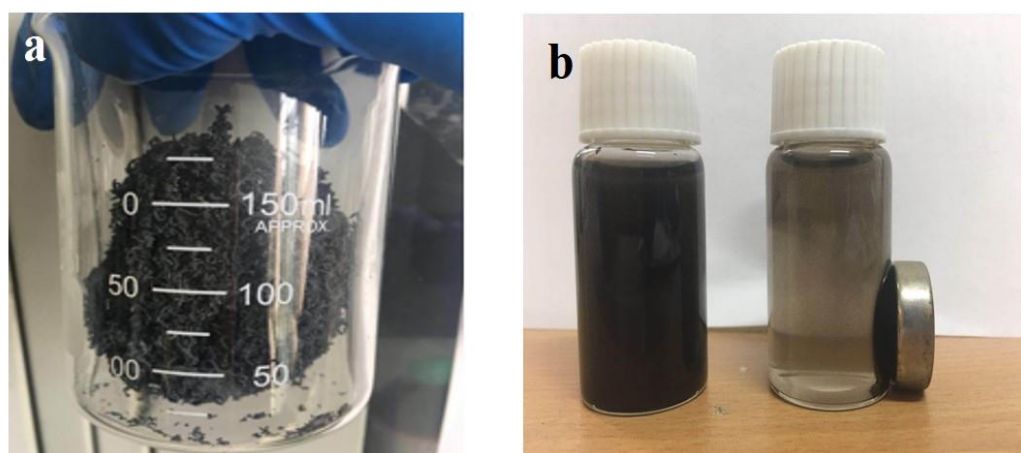

**Figure 3.** The picture of 0.5 g EG (a); Black EG/ $\text{Fe}_3\text{O}_4$  composite is rapidly separated under external magnetic field (b).
